# Supplementary material for: Low-stress livestock handling protects cattle in a five-predator habitat
Source: PeerJ. 2023 Feb 10;11:e14788. doi: 10.7717/peerj.14788 (PMC9924134; doi:10.7717/peerj.14788)
Supplement: Supplemental Information 1 — Approaches are defined as visits per camera trap day. Indirect sign are calculated as visits per large carnivore survey. Seq refers to the treatment sequence of either pseud-control-treatment (PC-T) or treatment-pseudo-control (T-PC). [file peerj-11-14788-s001.xlsx]

## Sheet: Sheet1
Herd	Seq	Treatment.Control	Phase	Wolf		Bear		Cougar		Coyote
				Approaches	Indirect sign	Approaches	Indirect sign	Approaches	Indirect sign	Approaches	Indirect sign
1	PC-T	PC	1	0	0.2	0.022	0.8	0	0	0	0.4
1	PC-T	T	2	0	0.5	0	0.75	0	0.25	0.021	0.5
2	PC-T	PC	1	0	0	0.033	0.63	0	0	0.079	0.25
2	PC-T	T	2	0	0.5	0.0099	0.67	0	0	0	0.33
3	PC-T	PC	1	0	0	0	0.44	0	0.11	0.0091	0.44
3	PC-T	T	2	0	0.29	0.0076	0.71	0	0	0.023	0.43
4	PC-T	PC	1	0	0	0.016	0.29	0	0	0.0055	0.57
4	PC-T	T	2	0	0	0	0.8	0	0	0.024	0.6
5	T-PC	T	1	0	0	0.0066	0.14	0	0	0	0.14
5	T-PC	PC	2	0	0.29	0.0063	0.29	0	0	0	1
6	T-PC	T	1	0	0.25	0.014	1.125	0	0	0.0035	0.13
6	T-PC	PC	2	0	0.33	0.043	0.67	0.026	0	0.034	0.17
7	T-PC	T	1	0.0067	0.38	0.04	0.38	0	0	0.013	0.25
7	T-PC	PC	2	0	0.57	0.023	0.43	0	0	0.03	0.43
8	T-PC	T	1	0	0.25	0	0.25	0	0	0.067	0.25
8	T-PC	PC	2	0	0.67	0	0.67	0	0	0	0
