# Supplementary material for: Low-stress livestock handling protects cattle in a five-predator habitat
Source: PeerJ. 2023 Feb 10;11:e14788. doi: 10.7717/peerj.14788 (PMC9924134; doi:10.7717/peerj.14788)
Supplement: Supplemental Information 2 — LC presence columns are based on number of days with at least one grizzly bear, black bear, wolf and coyote presence by phase is also included. [file peerj-11-14788-s002.xlsx]

## Sheet: Sheet1
Herd	Range Rider Days		Dose Effect		Grizzly Bear		Black Bear		Wolf		Coyote
	Phase 1	Phase 2	Phase 1	Phase 2	Phase 1	Phase 2	Phase 1	Phase 2	Phase 1	Phase 2	Phase 1	Phase 2
1	4	22	4	33	4	0	3	1	1	2	2	3
3	7	20	15	32	6	2	3	1	0	4	13	2
3	4	12	4	15	0	1	5	1	0	2	5	5
4	6	13	6	21	1	0	0	0	0	0	5	7
5	10	5	12	5	1	2	3	2	0	2	2	6
6	16	10	19	12	4	6	3	1	1	2	2	2
7	16	12	24	11	5	3	4	1	6	5	8	8
9	14	6	18	4	0	0	1	0	1	2	5	0
